# Supplementary material for: Mitochondrial genomes reveal recombination in the presumed asexual Fusarium oxysporum species complex
Source: PubMed Central journal article supplement (PMC5604515; doi:10.1186/s12864-017-4116-5), 2017-09-18

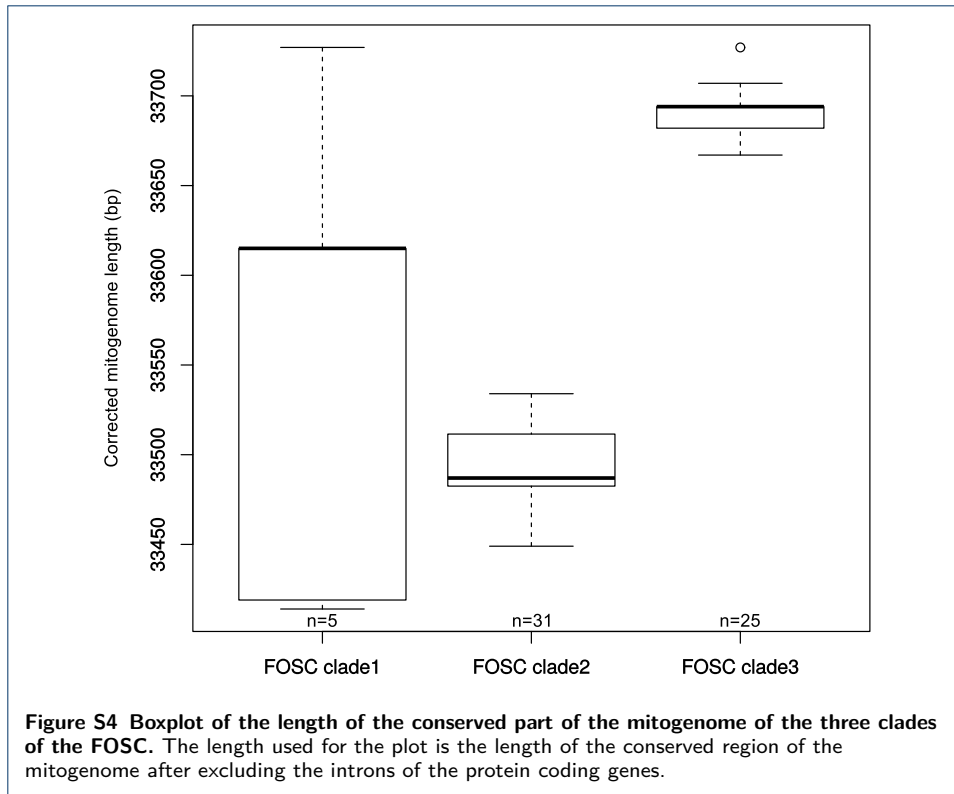

Supplement: 12864_2017_4116_MOESM3_ESM.pdf [file 12864_2017_4116_MOESM3_ESM.pdf]
